# Supplementary material for: Low QRS Voltage in Limb Leads Indicates Accompanying Precordial Voltage Attenuation Resulting in Underestimation of Left Ventricular Hypertrophy
Source: MDPI journal article supplement (doi:10.3390/ijerph182412867), 2021-12-07
Supplement: s1 [file s1]

**Supplementary Table S1.** Comparison of baseline characteristics between patients with LQRSV in limb leads and control group without LQRSV

|                                                                     | LQRSV in limb leads<br>(n = 292) | Control<br>(n = 194) | P value |
|---------------------------------------------------------------------|----------------------------------|----------------------|---------|
| Age (year)                                                          | 71.3 ± 6.7                       | 71.5 ± 6.1           | 0.78    |
| Male                                                                | 177 (60.6)                       | 98 (50.5)            | 0.03    |
| Height (cm)                                                         | 160.7 ± 8.9                      | 159.4 ± 8.8          | 0.20    |
| Weight (kg)                                                         | 62.0 ± 10.7                      | 59.5 ± 10.1          | 0.01    |
| BMI (kg/m <sup>2</sup> )                                            | 23.9 ± 3.3                       | 23.3 ± 3.0           | 0.03    |
| Hypertension                                                        | 150 (51.0)                       | 98 (50.5)            | 0.85    |
| Diabetes                                                            | 78 (26.7)                        | 50 (25.8)            | 0.82    |
| Structural heart disease*                                           | 18 (6.2)                         | 21 (10.8)            | 0.06    |
| Ventricular dilatation                                              | 5 (1.7)                          | 12 (6.2%)            | 0.01    |
| Classic etiologies of LQRSV                                         | 40 (13.7)                        | 7 (3.6)              | <0.001  |
| Infiltrative cardiomyopathy                                         | 0 (0.0)                          | 0 (0.0)              | 0.999   |
| Pericardial effusion, moderate to large                             | 6 (2.0)                          | 1 (0.5)              | 0.07    |
| Pulmonary hyperinflation, emphysema,<br>or obstructive lung disease | 18 (6.2)                         | 5 (2.6)              | 0.07    |
| Pleural effusion, large to massive                                  | 3 (1.0)                          | 0 (0.0)              | 0.16    |
| BMI ≥ 30 kg/m <sup>2</sup>                                          | 14 (4.8)                         | 2 (1.0)              | 0.02    |

Values are presented as the mean ± SD or number (percentage). \*Structural heart disease included left ventricular systolic dysfunction, valvular heart disease, ischemic or non-ischemic cardiomyopathy other than infiltrative cardiomyopathy. BMI, body mass index; LQRSV, low QRS voltage.
